# Supplementary material
Source: Springer Nature journal article supplement (https://www.springermedizin.de/resource/supplementary/12916_2011_535_MOESM2_ESM.pdf/9598084)
Supplement: MOESM2 [file 9598084]

Virulent  
pathogen  
genotype

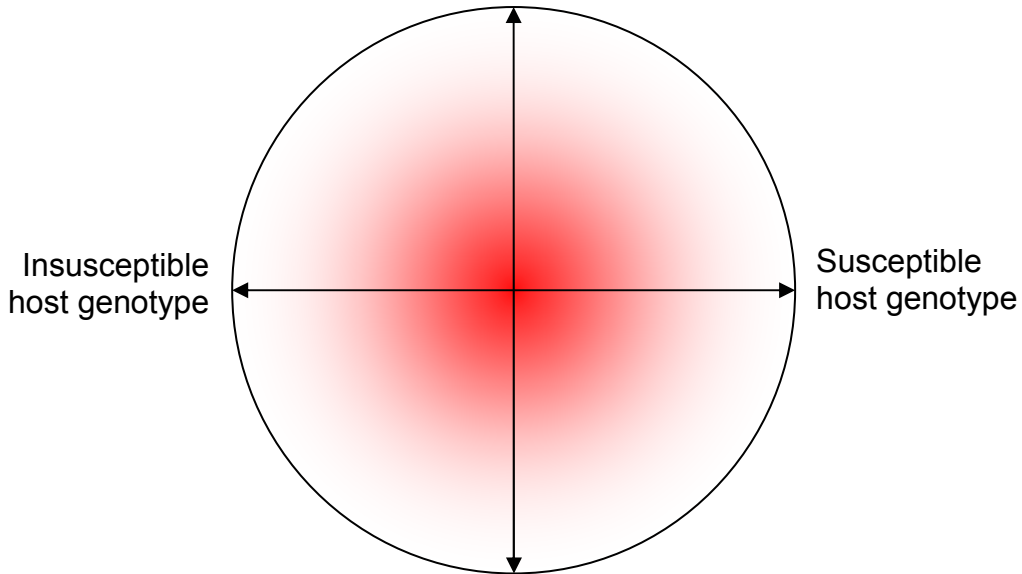

Insusceptible  
host genotype

Susceptible  
host genotype

Avirulent  
pathogen  
genotype
